# Supplementary material
Source: Springer Nature journal article supplement (https://www.springermedizin.de/resource/supplementary/12889_2010_2817_MOESM2_ESM.pdf/9490028)
Supplement: MOESM2 [file 9490028]

## Pattern Matrix

|                                         | Component |      |       |      |      |
|-----------------------------------------|-----------|------|-------|------|------|
|                                         | 1         | 2    | 3     | 4    | 5    |
| Heat                                    | ,679      |      |       |      |      |
| Draught                                 | ,634      |      |       |      |      |
| Cold                                    | ,546      |      | -,469 |      |      |
| Increased susceptibility for infections | ,530      |      |       |      |      |
| Weakened skin barrier                   |           | ,798 |       |      |      |
| Skin contact                            |           | ,751 |       |      |      |
| Vibrations                              |           |      | -,840 |      |      |
| Protective measures                     |           |      | -,625 |      |      |
| Allergy                                 |           |      |       | ,895 |      |
| Dust, smoke, gases and fumes            | ,457      |      |       | ,582 |      |
| 'Noise nuisance'                        |           |      |       |      | ,990 |

Extraction Method: Principal Component Analysis.

Rotation Method: Oblimin with Kaiser Normalization.

KMO: 0.675; MSA > 0.558

Cumulative percentage of variance explained (five factors): 61.6%
